# Supplementary material for: A simple fluorescent receptor selective for Mg2+
Source: Royal Society of Chemistry journal article supplement (doi:10.1039/c2an35200a), 2012-01-01
Supplement: c2an35200a.pdf [file c2an35200a.pdf]

# Supporting Information

## A Simple Fluorescent Receptor Selective for $\text{Mg}^{2+}$

Yingying Ma,<sup>a</sup> Hong Liu,<sup>b</sup> Shaopu Liu<sup>a</sup> and Rui Yang<sup>a,\*</sup>

<sup>a</sup> Key Laboratory on Luminescence and Real-Time Analysis, Ministry of Education, School of Chemistry and Chemical Engineering, Southwest University, Chongqing 400715, P.R. China

<sup>b</sup> Department of Chemistry, Bijie University, Bijie 551700, Guizhou Province, P.R. China

**Table 1.** Fluorescence spectral parameters of receptor **1** and **1**-cation complex, and cation binding constants ( $K_a$ ) in ACN

|                             | $\lambda_{\text{em}}$ , nm | $\Phi$ | $K_a$ , L mol <sup>-1</sup>   |
|-----------------------------|----------------------------|--------|-------------------------------|
| <b>1</b>                    | - <sup>a</sup>             | 0.0015 | - <sup>a</sup>                |
| <b>1</b> - $\text{Mg}^{2+}$ | 436                        | 0.262  | $(2.27 \pm 0.65) \times 10^7$ |
| <b>1</b> - $\text{Ca}^{2+}$ | 442                        | 0.091  | $(6.48 \pm 0.10) \times 10^6$ |
| <b>1</b> - $\text{Ba}^{2+}$ | 439                        | 0.015  | - <sup>a</sup>                |
| <b>1</b> - $\text{K}^+$     | 442                        | 0.005  | - <sup>a</sup>                |
| <b>1</b> - $\text{Na}^+$    | - <sup>a</sup>             | 0.003  | - <sup>a</sup>                |

a. Too weak to be determined

1. Photo of fluorescence of receptor **1** and **1**-cation complex in ACN

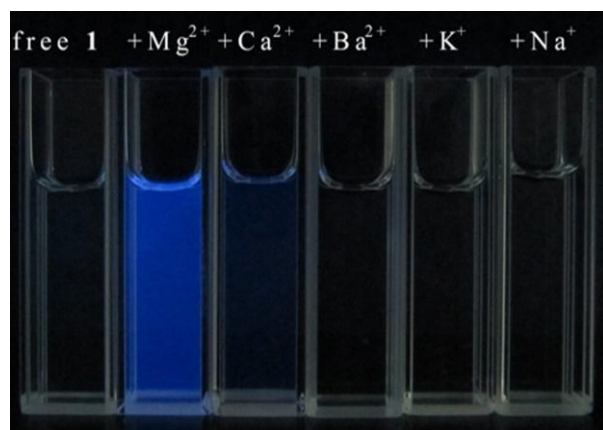

**Figure S1.** Photo of fluorescence of receptor **1** ( $1.0 \times 10^{-5}$  mol L<sup>-1</sup>) and **1**-cation (1 equiv) complex in ACN, which was taken under a hand UV (302 nm) lamp.

2. Fluorescence spectra of receptor **1** in ACN–H<sub>2</sub>O (9:1, V/V ) in the presence of Mg<sup>2+</sup>

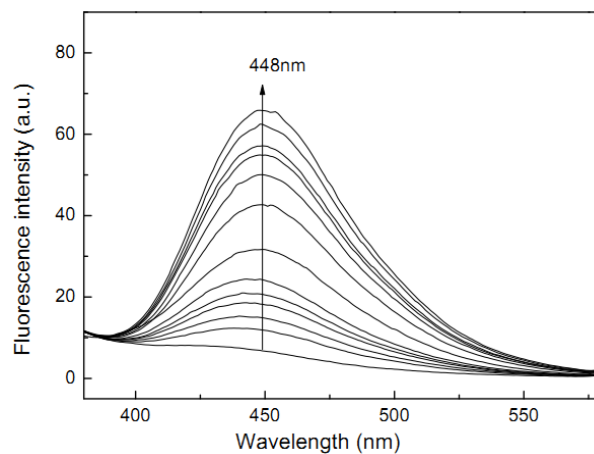

**Figure S2.** Fluorescence spectra of receptor **1** ( $1.0 \times 10^{-5}$  mol L<sup>-1</sup>) in ACN–H<sub>2</sub>O (9:1, V/V ) in the presence of increasing concentration of Mg<sup>2+</sup>.

3. Fluorescence intensity of receptor **1** in ACN–H<sub>2</sub>O (9:1, V/V ) in the presence of individual metal ions

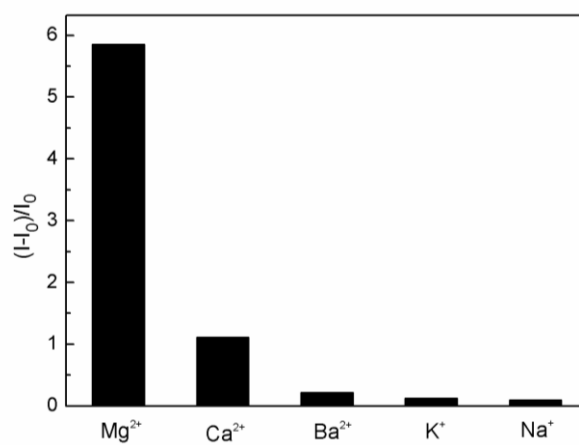

**Figure S3.** Fluorescence intensity of receptor **1** ( $1.0 \times 10^{-5}$  mol L<sup>-1</sup>) toward metal ions ( $1.0 \times 10^{-4}$  mol L<sup>-1</sup>) in ACN–H<sub>2</sub>O (9:1, V/V ).

#### 4. Absorption and fluorescence spectra of receptor **2** in ACN in the presence of $\text{Mg}^{2+}$

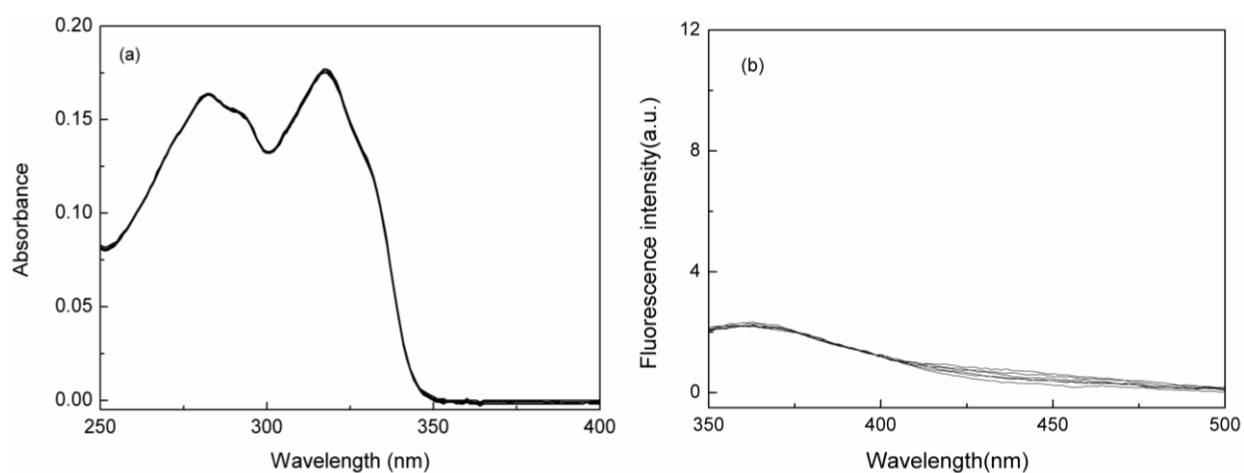

**Figure S4.** Absorption (a) and fluorescence (b) spectra of receptor **2** ( $1.0 \times 10^{-5} \text{ mol L}^{-1}$ ) in ACN in the presence of increasing concentration of  $\text{Mg}^{2+}$ . The excitation wavelength for obtaining fluorescence spectra was 298 nm.

#### 5. 2D COSY spectrum of receptor **1** in $\text{DMSO-}d_6$

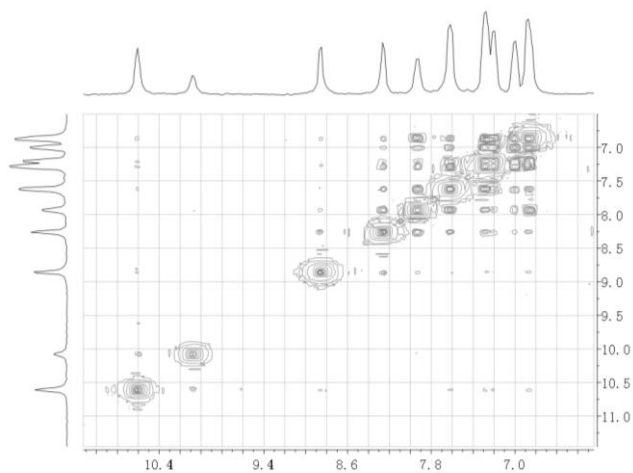

**Figure S5.** 500 MHz H-H COSY spectrum of receptor **1** in  $\text{DMSO-}d_6$

## 6. IR spectra of receptor **1** and **1**–Mg<sup>2+</sup> complex

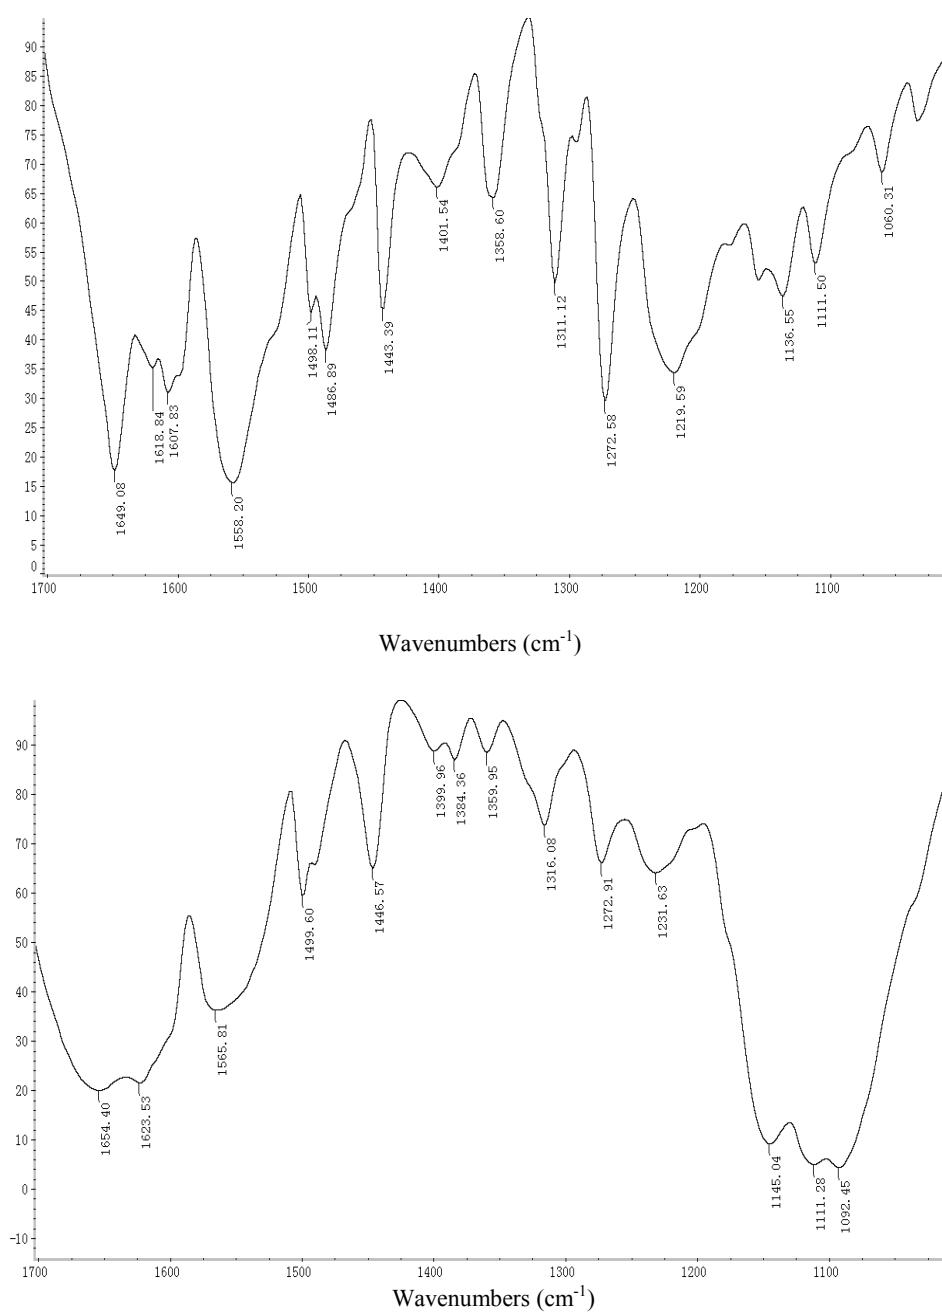

**Figure S6.** Partial IR spectra of receptor **1** (top) and **1**–Mg<sup>2+</sup> complex (bottom).
